# Supplementary material
Source: PubMed Central journal article supplement (PMC5007541)
Supplement: NIHMS813505-supplement-01.pdf [file NIHMS813505-supplement-01.pdf]

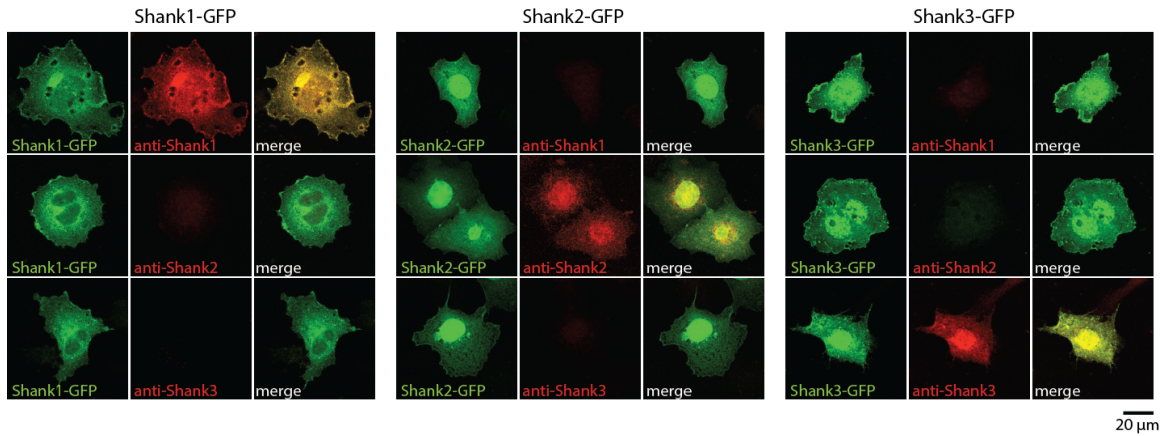

### Supplemental Figure 1.

COS7 cells were transfected with rat Shank1-GFP (left panels), rat Shank2-GFP (middle panels) or rat Shank3-GFP (right panels), fixed and stained with anti-Shank1 (top row), anti-Shank2 (middle row) or anti-Shank3 (bottom row). Note that each of the antibodies only recognizes the correct Shank isoform with no observable cross-reactivity.
